# Supplementary material for: External location of touch is constructed post-hoc based on limb choice
Source: eLife journal article supplement (doi:10.7554/elife.57804), 2020-09-18
Supplement: supp [file elife_poa_e57804_Figure_7_figure_supplement_4.pdf › elife_poa_e57804_Figure_7_figure_supplement_4.pdf]

# Subject 07

Localization error [cm]

SOA: 60 ms

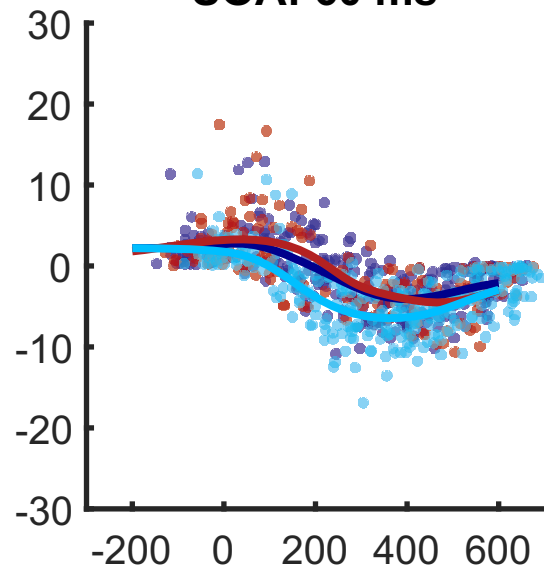

SOA: 85 ms

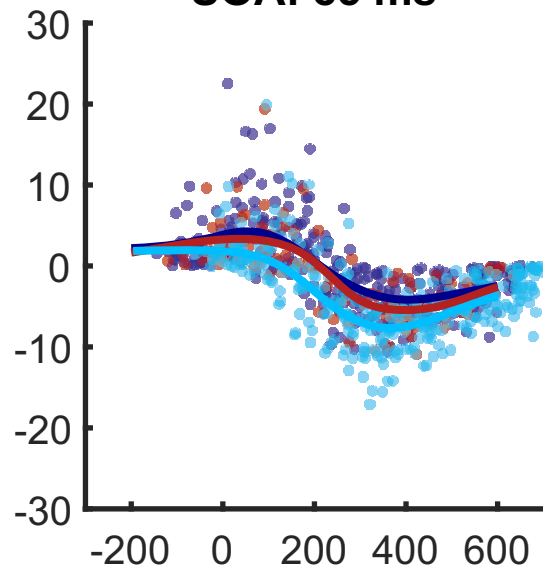

SOA 110 ms

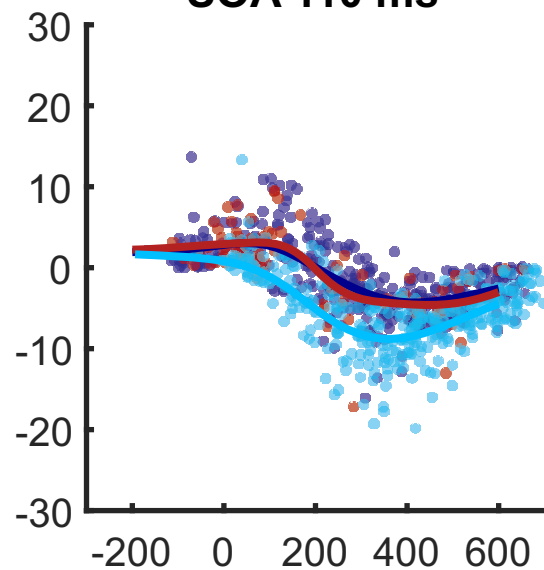

SOA 135 ms

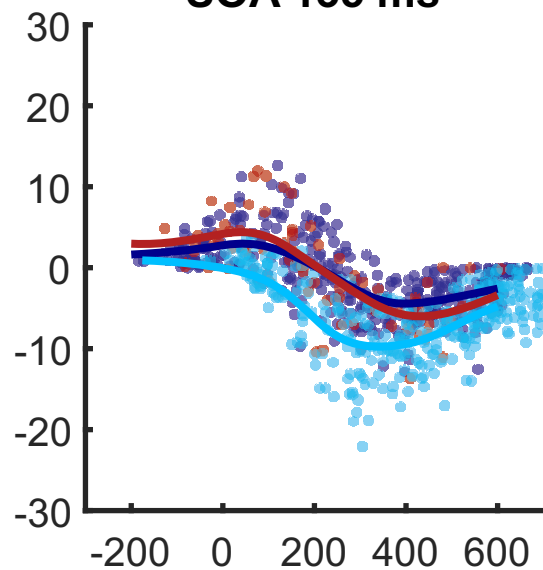

- Correct TOJ: 1st time point
- Incorrect TOJ: 1st time point
- Correct TOJ: 2nd time point

Time of stimulus relative to movement onset [ms]
