# Supplementary figures and images for: External location of touch is constructed post-hoc based on limb choice
Source: eLife journal article supplement (doi:10.7554/elife.57804), 2020-09-18

uncrossed-uncrossed

crossed-crossed

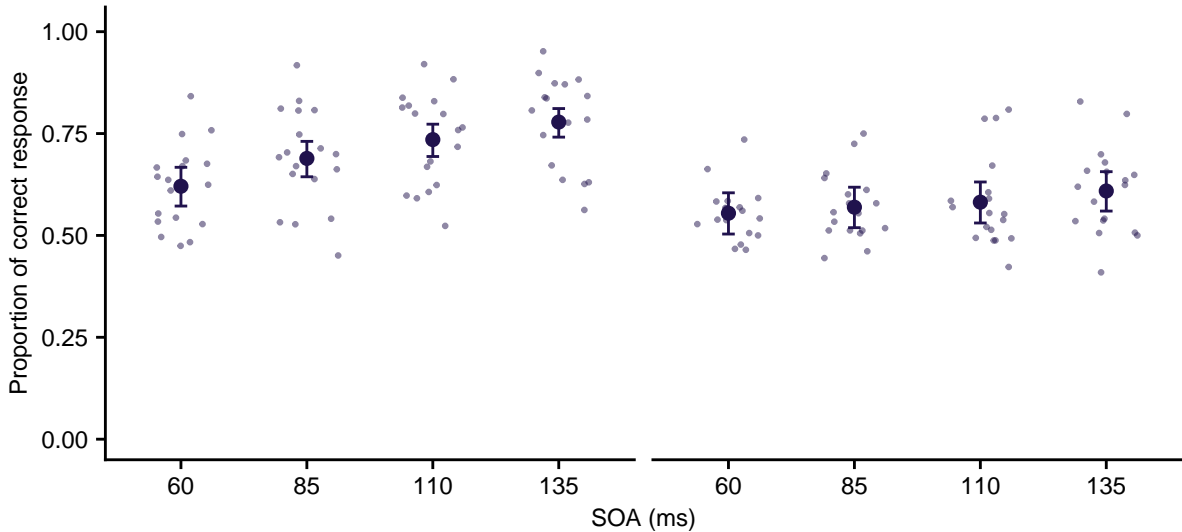

Supplement: supp [file elife_poa_e57804_Figure_7_figure_supplement_1.pdf › elife_poa_e57804_Figure_7_figure_supplement_1.pdf]
